# Supplementary material for: A coral-like polyaniline/barium titanate nanocomposite electrode with double electric polarization for electrochromic energy storage applications
Source: Royal Society of Chemistry journal article supplement (doi:10.1039/d0ta08263e), 2020-12-12
Supplement: d0ta08263e1.pdf [file d0ta08263e1.pdf]

## Electronic Supplementary Information (ESI)

For

### **Coral-like Polyaniline/Barium Titanate Nanocomposite Electrode with Double Electric Polarization for Electrochromic Energy Storage Applications**

**Hongchao Peng <sup>a,#</sup>, Bin Yan <sup>a,#</sup>, Mengjin Jiang <sup>b</sup>, Baicang Liu <sup>c</sup>, Yingchun Gu <sup>a</sup>,  
Guo Yao <sup>a</sup>, Yong Zhang <sup>a</sup>, Lanlin Ye <sup>a</sup>, Xue Bai <sup>a</sup>, Sheng Chen <sup>a,\*</sup>**

*<sup>a</sup> Functional Polymer Materials Laboratory, College of Biomass Science and  
Engineering, Sichuan University, Chengdu, 610065, China*

*<sup>b</sup> College of Polymer Science and Engineering, Sichuan University, Chengdu 610065,  
China*

*<sup>c</sup> Institute of New Energy and Low-Carbon Technology, Sichuan University, Chengdu,  
610207, China*

*<sup>#</sup> H. Peng and B. Yan contributed equally to this work.*

*<sup>\*</sup> Corresponding author: chensheng@scu.edu.cn (S. Chen)*

## Supplementary Figures

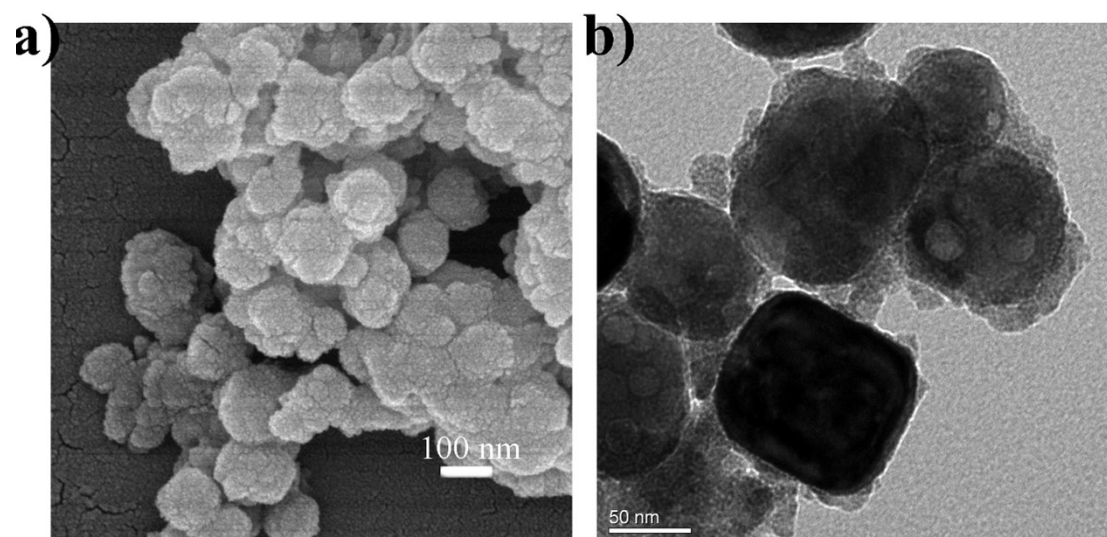

**Figure S1.** The SEM (a) and TEM (b) images of M-BT particles.

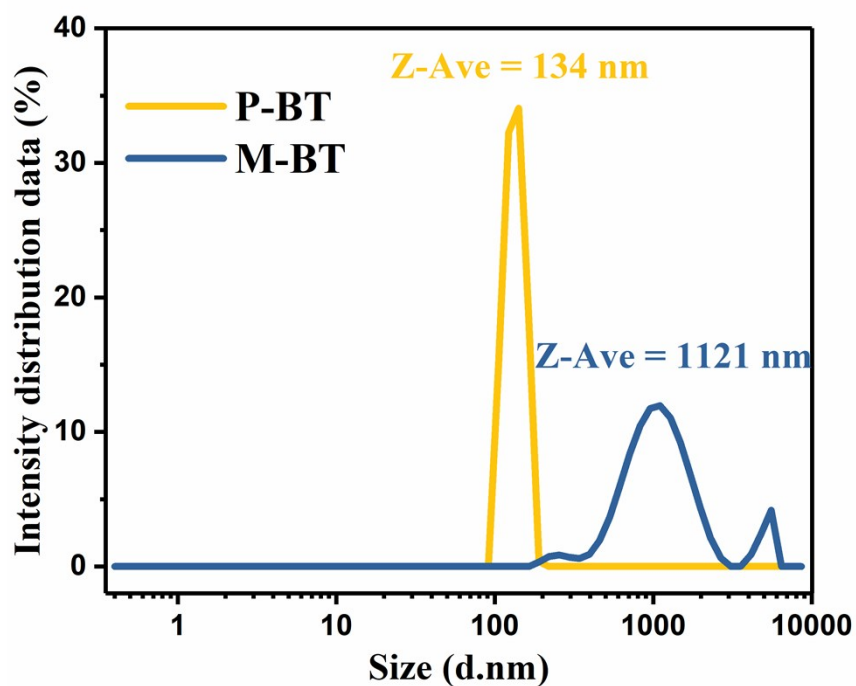

**Figure S2.** The particle size distribution of initial BT particles (P-BT) and modified BT particles (M-BT).

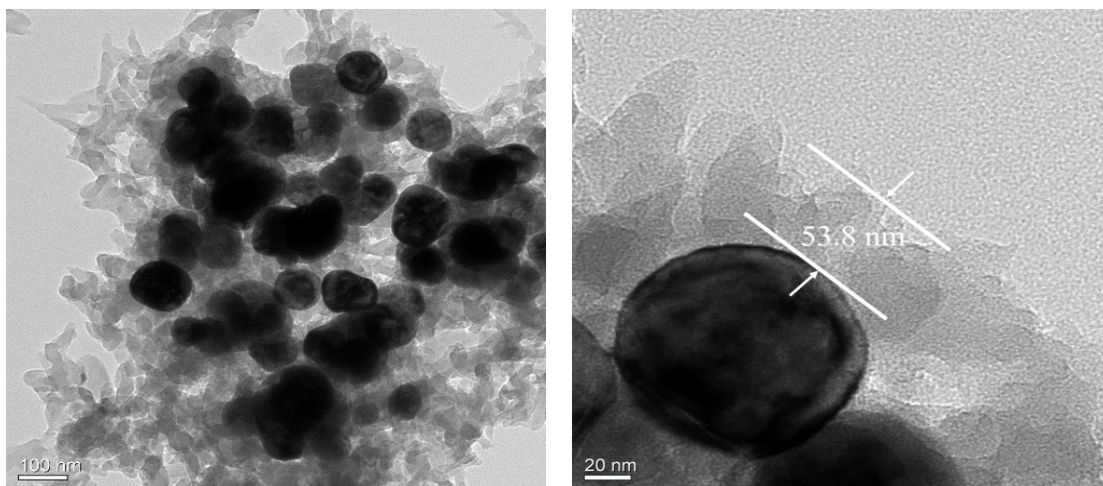

**Figure S3.** The TEM images of 30BT/70PANI.

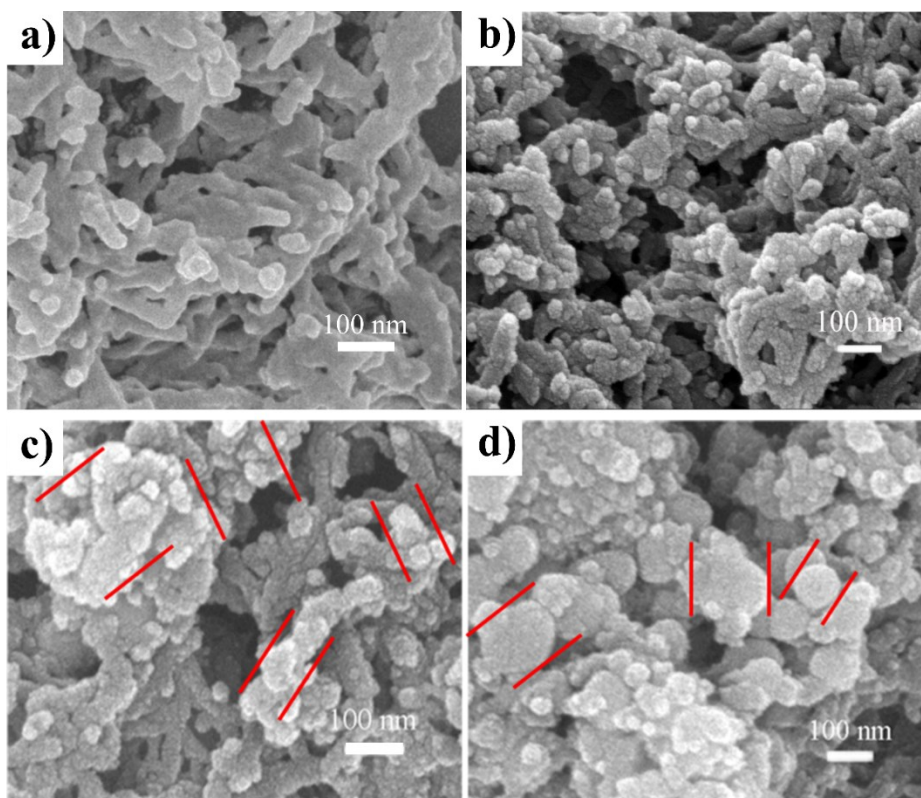

**Figure S4.** The SEM images of a) 10BT/90PANI, b) 30BT/70PANI, c) 50BT/50PANI, and d) 70BT/30PANI.

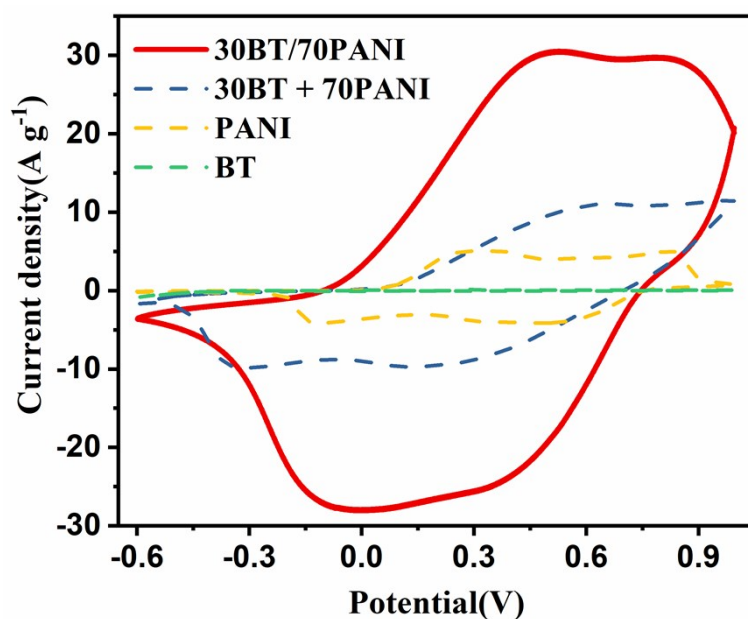

**Figure S5.** The cyclic voltammograms of 30BT/70PANI, pure PANI, pure BT, and the mixture of 30BT+70PANI at 100 mV s<sup>-1</sup>.

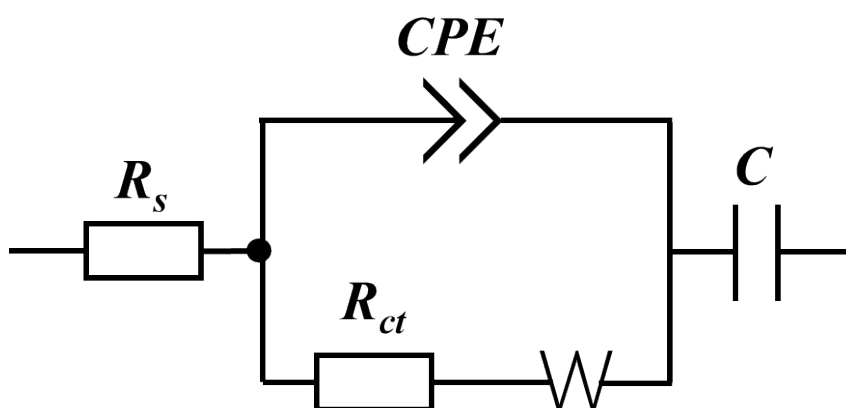

**Figure S6.** Equivalent circuits that optimally fit with obtained Nyquist plots of BT/PANI electrodes.

**Table S1.** Electrical parameters for both of pure PANI and the 30BT/70PANI electrode evaluated from EIS test.

| Sample      | $R_s$ ( $\Omega$ ) | $CPE$                         |       | $R_{ct}$ ( $\Omega$ ) | $W$ ( $\Omega \cdot s^{-5}$ ) | $C$ ( $\mu F \cdot cm^{-2}$ ) | Error (%) |
|-------------|--------------------|-------------------------------|-------|-----------------------|-------------------------------|-------------------------------|-----------|
|             |                    | $Y_0$ , ( $\mu S \cdot s^n$ ) | n     |                       |                               |                               |           |
| Pure PANI   | 7.67               | 2.736                         | 0.841 | 30.52                 | 37.04                         | 3.345                         | <2.029    |
| 30BT/70PANI | 1.34               | 6.906                         | 0.924 | 12.04                 | 11.49                         | 36.35                         | <3.168    |

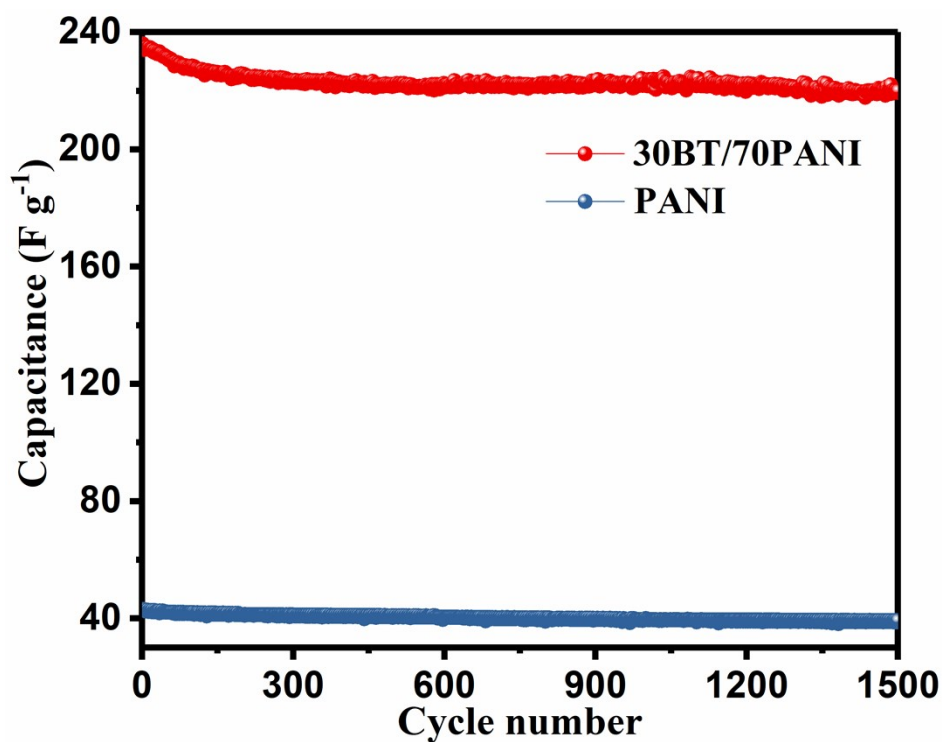

**Figure S7.** Cycle stability of specific capacitance of 30BT/70PANI and pure PANI electrode at 10 A/g.

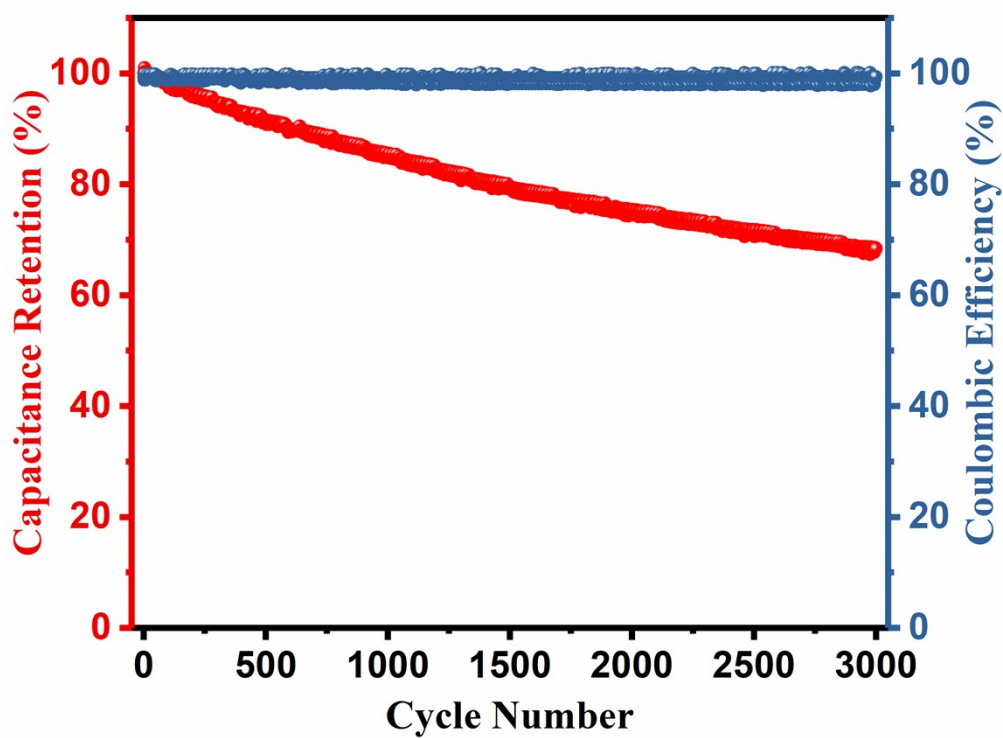

**Figure S8.** Cycle stability of specific capacitance of 30BT/70PANI electrode at 20 A/g.

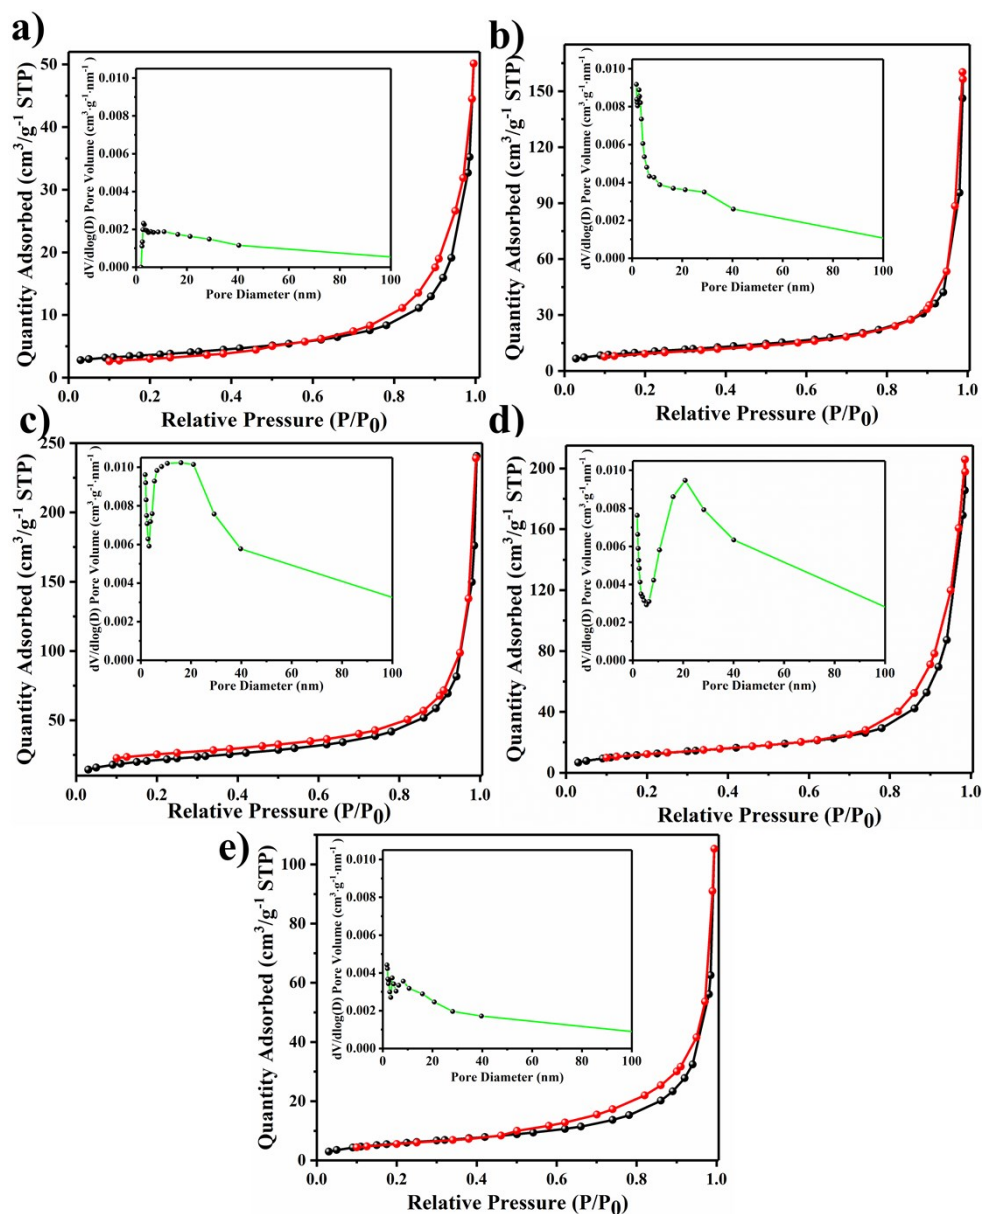

**Figure S9.** Nitrogen adsorption isotherms curves of a) pure PANI, b) 10BT/90PANI, c) 30BT/70PANI, d) 50BT/50PANI, and e) 70BT/30PANI. (The insets are their corresponding pore size distributions).

**Table S2.** The specific surface area and pore size of pure PANI, 10BT/90PANI, 30BT/70PANI, 50BT/50PANI, and 70BT/30PANI nanocomposites.

| Sample      | Surface area<br>(m <sup>2</sup> /g) | Single point surface area<br>(m <sup>2</sup> /g) | Pore size<br>(nm) |
|-------------|-------------------------------------|--------------------------------------------------|-------------------|
| Pure PANI   | 12.6281                             | 11.2650                                          | 17.4865           |
| 10BT/90PANI | 36.4739                             | 35.3952                                          | 20.4512           |
| 30BT/70PANI | 55.7942                             | 53.1129                                          | 23.6522           |
| 50BT/50PANI | 43.3160                             | 40.8225                                          | 21.5364           |
| 70BT/30PANI | 22.3716                             | 21.0687                                          | 18.8413           |

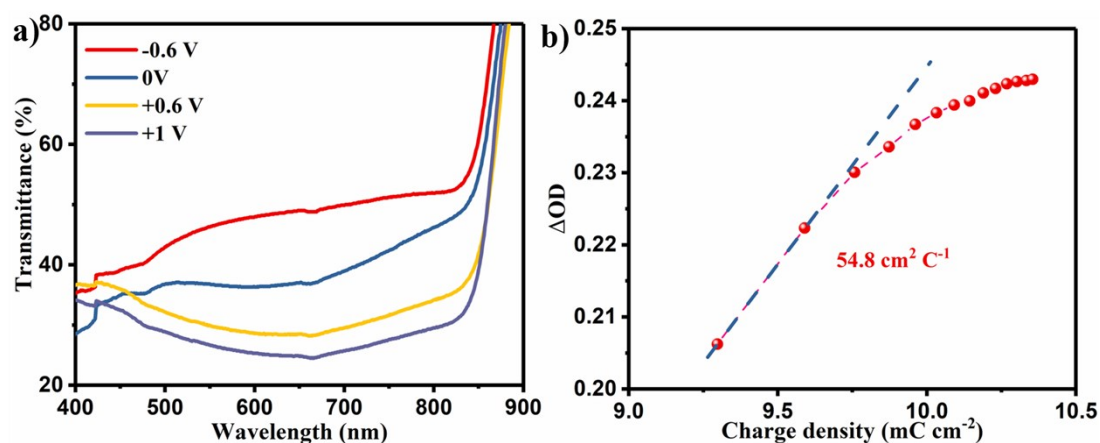

**Figure S10.** a) UV-vis transmittance spectra of 30BT/70PANI electrode; b) Coloration efficiency of 30BT/70PANI electrode.

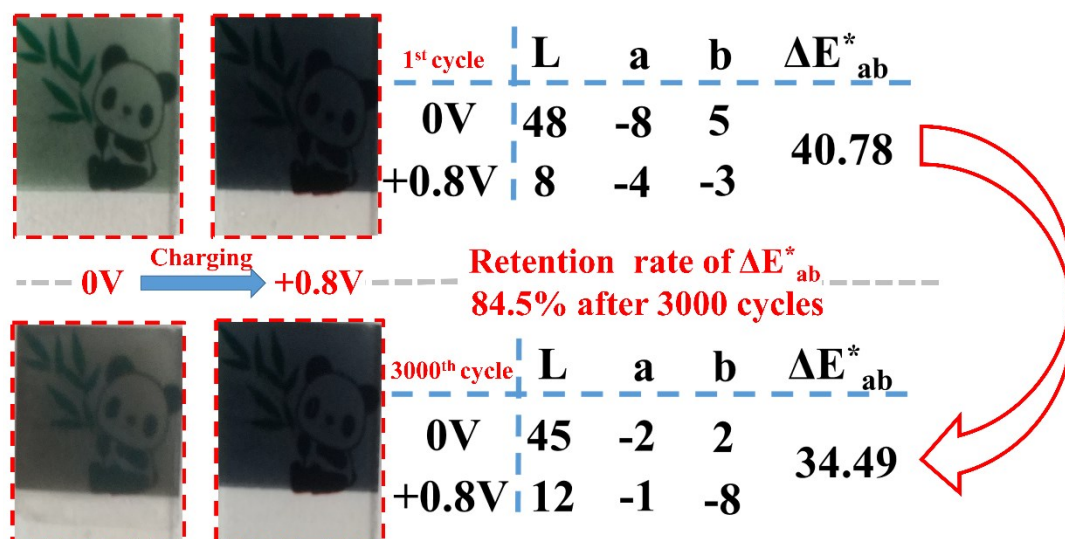

**Figure S11.** The photographic images of 30BT/70PANI electrode before and after 3000 galvanostatic charging–discharging cycles at a current density of  $20 \text{ A g}^{-1}$  and their corresponding “L a b” and  $\Delta E_{ab}^*$  value.
